# Supplementary material for: Multiplex epitope mapping using bacterial surface display reveals both linear and conformational epitopes
Source: PubMed Central journal article supplement — Sci Rep. 2012 Oct 4;2:706. doi: 10.1038/srep00706 (PMC3463815; doi:10.1038/srep00706), 2012-10-04
Supplement: srep00706-s1.pdf [file srep00706-s1.pdf]

## Supplemental Information

# Multiplex epitope mapping using bacterial surface display reveals both linear and conformational epitopes

Elton P Hudson<sup>1</sup>, Mathias Uhlen,<sup>1,2</sup> and Johan Rockberg<sup>1</sup>

<sup>1</sup>School of Biotechnology, AlbaNova University Center, Royal Institute of Technology, Stockholm, Sweden, <sup>2</sup>Science for Life Laboratory, Royal Institute of Technology, Stockholm, Sweden,

## Supplemental methods

### *Construction of VEGF fragments*

Oligonucleotides corresponding to top and bottom strands of the Avastin epitopes (F1, F2, and F3) were ordered (MWG Eurofins) with *NotI* and *AscI* sites (lower case) for cloning into the pSCEM2 vector. To construct the F3 fragment we annealed and ligated four oligos simultaneously into the pSCEM2 vector.

AVA F1 F: ggccgcaCCTCACCAAGGCCAGCACATAGGAGAGATGgg

AVA F1 R: cggccCATCTCTCCTATGTGCTGGCCTTGGTGAGGtgc

AVA F2 F: ggccgcaACCATGCAGATTATGCGGATCAAACCTgg

AVA F2 R: cggccAGGTTTGATCCGCATAATCTGCATGGTtgc

AVA F3 Fi: ggccgcaATCACCATGCAGATTATGCGGATCAAACCTCACC

AVA F3 Fii: AAGGCCAGCACATAGGAGAGATGAGCgg

AVA F3 Ri: gggccGTCATCTCTCCTATGTGCTGGCCTT

AVA F3 Rii: GGTGAGGTTTGATCCGCATAATCTGCATGGTGATtgc

Successful insertion of the F1, F2, or F3 fragment was confirmed with DNA sequencing.

**Supplemental File 1.** SI TargetList.xls A Microsoft Excel file containing details on all targets in the MTF library, including primers used for PCR amplification of ECDs.

**Table SI 1.** Epitopes determined using single-gene and MTF libraries.

| PSMA epitopes (PSMA Uniprot ID Q04609)<br>PSMA pAb HPA HPA010593 |         |                                                                                                                                                                  |
|------------------------------------------------------------------|---------|------------------------------------------------------------------------------------------------------------------------------------------------------------------|
| PSMA mAb E1                                                      | 473-491 | LVHNLTKELKSPDEGFEGK                                                                                                                                              |
| PSMA pAb antigen (PrEST)                                         | 232-337 | ADYFAPGVKSYPDGWNLPGGGVQRGNILNLNGAGDPLTPG<br>YPANEYAYRRGIAEAVGLPSIPVHPIGYYDAQKLEKMGGS<br>APPDSSWRGSLKVPYNVGPGFTGNF                                                |
| PSMA pAb E1                                                      | 231-245 | PADYFAPGVKSYPDG                                                                                                                                                  |
| PSMA pAb E2                                                      | 253-264 | VQRGNILNLNGA                                                                                                                                                     |
| PSMA pAb E3                                                      | 287-301 | VGLPSIPVHPIGYYD                                                                                                                                                  |
| PSMA pAb E4                                                      | 317-331 | SSWRGSLKVPYNVGP                                                                                                                                                  |
| EGFR epitopes (EGFR Uniprot ID Q504U8)<br>EGFR pAb HPA001200     |         |                                                                                                                                                                  |
| EGFR pAb antigen (PrEST)                                         | 299-447 | EFKDLSINATNIKHFKNCTISISGDLHILPVAFRGDSFHTHPPL<br>DPQELDILKTVEITGFLLIQAWPENRTDLHAFENLEIIRGRT<br>KQHGGFSLAVVSLNITSLGLRSLKEISDGDVIISGNKNLCYAN<br>TINWKKLFGTSGQKTKIIS |
| EGFR pAb E1                                                      | 344-352 | PQELDILKT                                                                                                                                                        |
| EGFR pAb E2                                                      | 381-398 | IRGRTKQHGGFSLAVVSL                                                                                                                                               |
| EGFR pAb E3                                                      | 425-442 | CYANTINWKKLFGTSGQK                                                                                                                                               |
| VEGF epitopes (VEGF Uniprot ID P15692)                           |         |                                                                                                                                                                  |
| VEGF mAb E1                                                      | 45-50   | YIFKPS                                                                                                                                                           |
| VEGF pAb E1                                                      | 3-8     | AEGGGQ                                                                                                                                                           |
| VEGF pAb E2                                                      | 11-16   | HEVVKF                                                                                                                                                           |
| Avastin epitopes and constructs                                  |         |                                                                                                                                                                  |
| Avastin E1 (Enriched fragment)                                   | 34-121  | DIFQEYPDEIEYIFKPCVPLMRCGGCCNDEGLECVPTESNIT<br>MQIMRIKPHQGQHIGEMSFLQHNKCECRPKKDRARQEKCDK<br>PRR                                                                   |
| F1 construct                                                     | 84-94   | KPHQGQHIGEM                                                                                                                                                      |
| F2 construct                                                     | 77-85   | TMQIMRIKP                                                                                                                                                        |
| F3 construct                                                     | 75-96   | NITMQIMRIKPHQGQHIGEMSF                                                                                                                                           |
| EGFR pAb Off-target binding                                      |         |                                                                                                                                                                  |
| ITGAL2b enriched (Uniprot ID <b>P08514</b> )                     | 877-953 | PSPIHPAHHKRDRRQIFLPEPEQPSRLQDPVLVSCDSAPCTVV<br>QCDLQEMARGQRAMVTVLAFLWLPSLYQRPLDQF                                                                                |
| IL-17 not enriched (Uniprot ID Q16552)                           | 79-100  | NEDPERYPSVIWEAKCRHLGCI                                                                                                                                           |

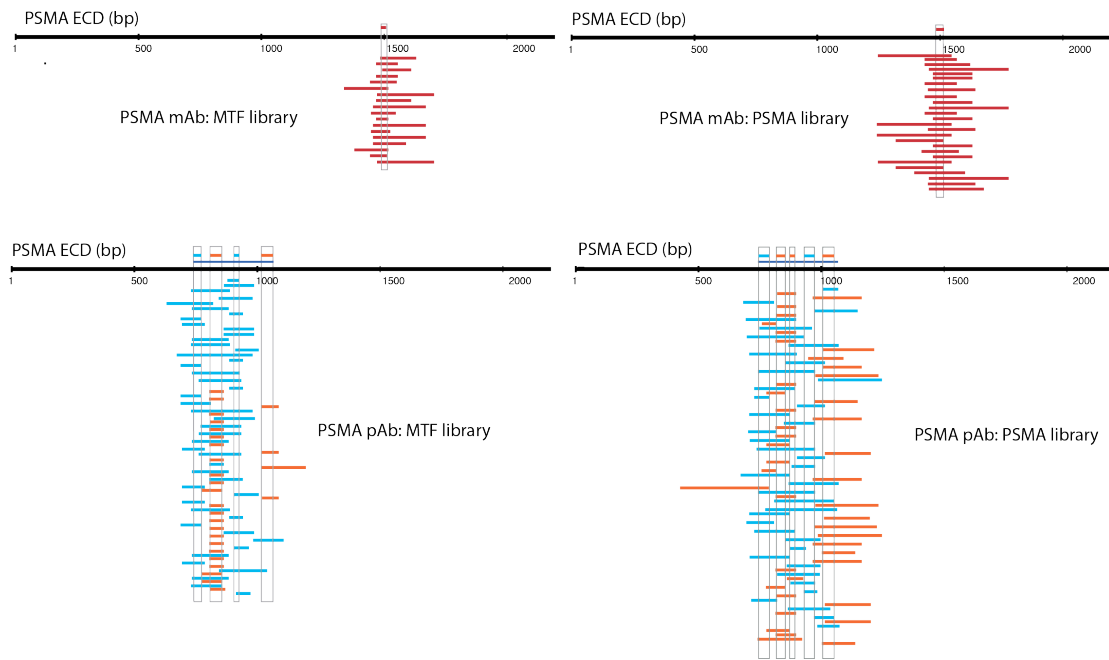

**Figure SI 1. Details of anti PSMA mAb and anti PSMA pAb HPA010593 epitope mapping using dedicated and MTF libraries.** Epitope mapping as described in Methods. Top: Epitope mapping of mAb. Bottom: Epitope mapping of pAb. Blue bars: High gate alignments, Orange bars: Low gate alignments. The blue bar over the gene is the antigen PrEST (described in Table SI 1).

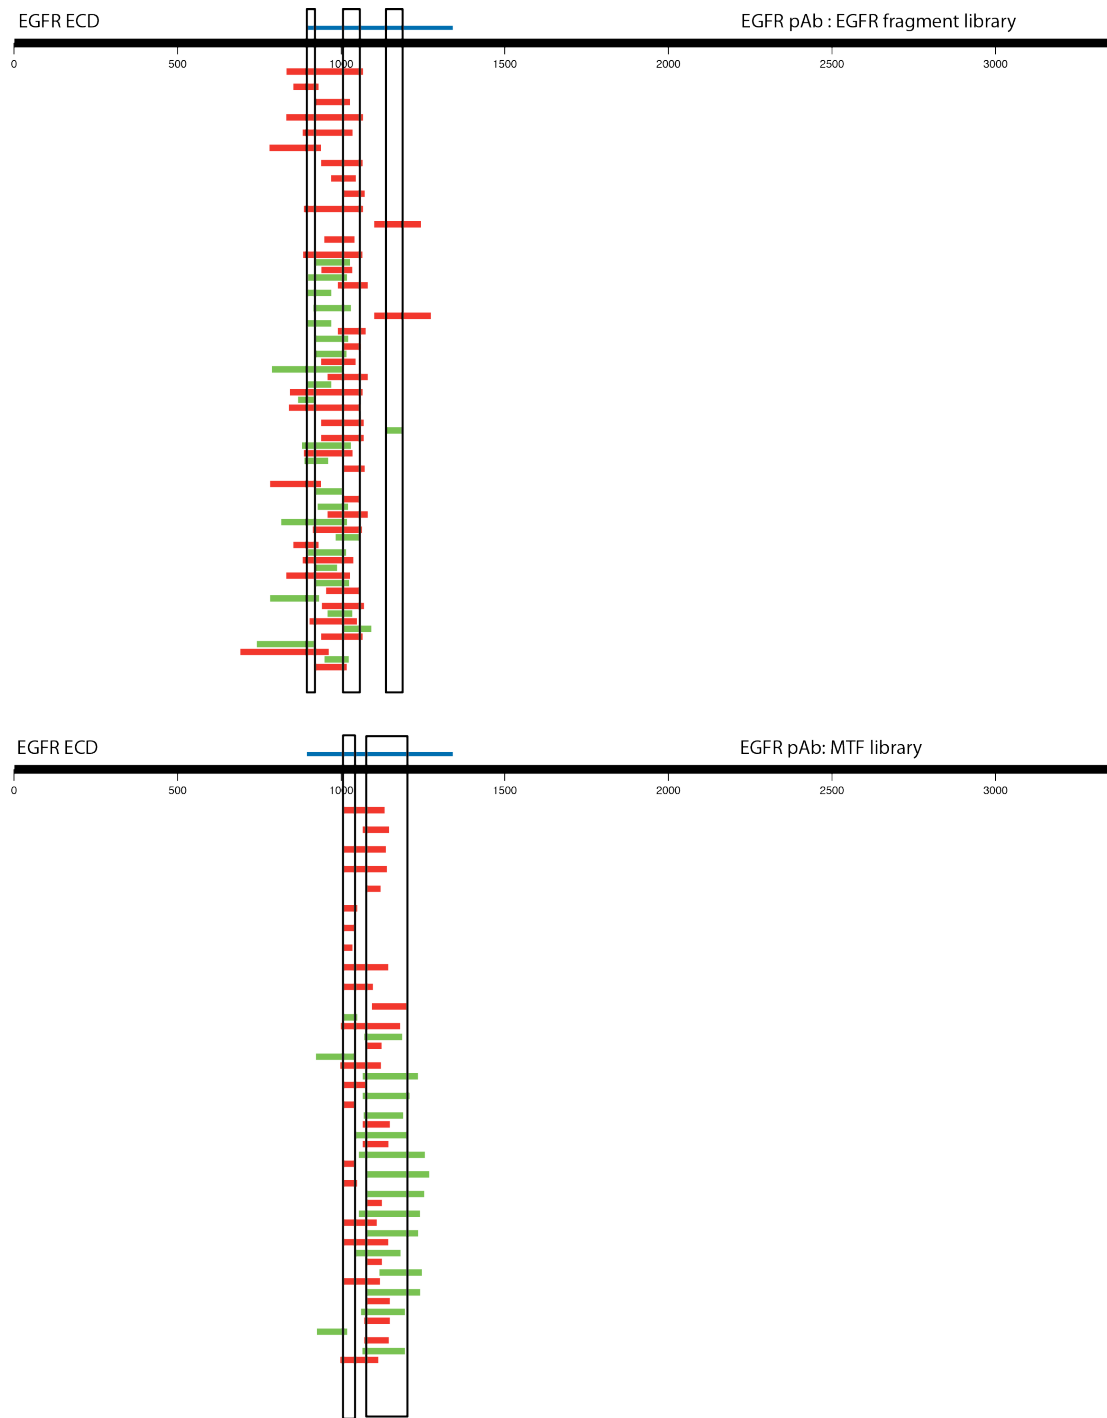

**Figure SI 2. Details of anti EGFR pAb HPA001200 epitope mapping using dedicated and MTF libraries.** Epitope mapping as described in Methods. Red bars: High gate alignments, Green bars: Low gate alignments. The blue bar over the gene is the antigen PrEST (described in Table SI 1).

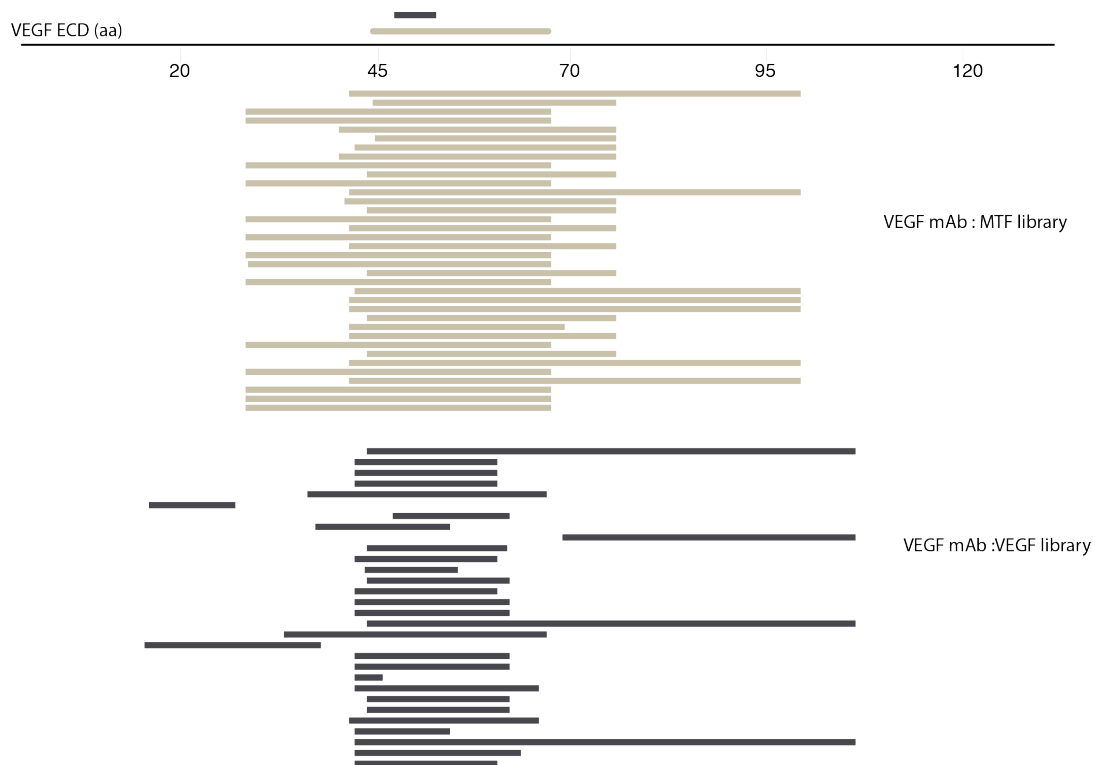

**Figure SI 3. Details of anti VEGF mAb epitope mapping using dedicated and MTF libraries.** Epitope mapping as described in Methods. Consensus epitopes are shown over the gene. Details of eptiopes are shown in Table SI 1.

27.8% identity in 36 residues overlap; Score: 42.0; Gap frequency: 11.1%

```
EGFR_PrEST      19 CTSISGDLHILPVAFRG----DSFTHTPPLDPQELD
ITGA2b_enr     40 CTVVQCDLQEMARGQRAMVTVLAFWLWPSLYQRPLD
                **      **          *          *  *  *  **
```

---

26.3% identity in 19 residues overlap; Score: 36.0; Gap frequency: 0.0%

```
EGFR_PrEST      27 HILPVAFRGDSFTHTPPLD
ITGA2b_enr     57 MVTVLAFWLWPSLYQRPLD
                **          ***
```

**Figure SI 4. Homology alignments of EGFR PrEST and ITGA2b<sub>877-956</sub> fragment enriched by FACS.** Alignments were performed with the ExPASy SIM alignment tool (<http://web.expasy.org/sim/>) with the BLOSUM30 algorithm and gap and extension penalties at -12 and -4, respectively.
